# Supplementary material
Source: PubMed Central journal article supplement (PMC8169157)
Supplement: ehaa947_supplementary_data.pdf [file ehaa947_supplementary_data.pdf]

**Sodium Intake, Life Expectancy and Mortality**

**Table S1.** Country-level data as extracted from different sources for the year of 2010.

| Country                  | Sodium intake (grams/day) | Healthy life expectancy at birth (years) | Healthy life expectancy at age 60 (years) | ASDR all-cause mortality | ASDR non-communicable diseases | Age standardized BMI (kg/m <sup>2</sup> ) | Population counts `000 | GDP USD       | World Bank - Income class |
|--------------------------|---------------------------|------------------------------------------|-------------------------------------------|--------------------------|--------------------------------|-------------------------------------------|------------------------|---------------|---------------------------|
| Afghanistan              | 3.39                      | 51.6                                     | 11                                        | 1327.4                   | 882.9                          | 22.7                                      | 28803                  | 16077921111   | 4                         |
| Albania                  | 3.67                      | 66.4                                     | 15.4                                      | 678.8                    | 607.3                          | 26.1                                      | 2941                   | 11926948284   | 2                         |
| Algeria                  | 4.28                      | 64.5                                     | 15.1                                      | 613.5                    | 482.7                          | 25.1                                      | 36118                  | 161207304960  | 2                         |
| Angola                   | 2.49                      | 51.8                                     | 12.8                                      | 1372.7                   | 583.1                          | 22.8                                      | 23369                  | 83799484640   | 3                         |
| Antigua and Barbuda      | 2.67                      | 66.5                                     | 15.8                                      | 657.0                    | 528.2                          | 26.1                                      | 95                     | 1147940741    | 2                         |
| Argentina                | 3.00                      | 67.3                                     | 16.6                                      | 610.7                    | 481.3                          | 27.1                                      | 41224                  | 426487434874  | 2                         |
| Armenia                  | 4.92                      | 65.2                                     | 14.8                                      | 754.2                    | 676.1                          | 26                                        | 2877                   | 9875378350    | 3                         |
| Australia                | 3.42                      | 72.2                                     | 19.7                                      | 361.6                    | 318.3                          | 26.9                                      | 22120                  | 1293794181138 | 1                         |
| Austria                  | 3.95                      | 71.4                                     | 18.7                                      | 414.1                    | 369.9                          | 25.4                                      | 8410                   | 391892746545  | 1                         |
| Azerbaijan               | 5.06                      | 63.4                                     | 14.2                                      | 845.8                    | 733.1                          | 26.4                                      | 9032                   | 52905998879   | 2                         |
| Bahamas                  | 2.99                      | 66.4                                     | 17.2                                      | 606.3                    | 454.6                          | 27.5                                      | 361                    | 10095768962   | 1                         |
| Bahrain                  | 5.38                      | 66.3                                     | 14.5                                      | 604.2                    | 543.5                          | 25                                        | 1241                   | 25713271277   | 1                         |
| Bangladesh               | 3.54                      | 60.7                                     | 13.7                                      | 827.0                    | 543.5                          | 21.1                                      | 152149                 | 114507797698  | 4                         |
| Barbados                 | 3.42                      | 66.2                                     | 15.1                                      | 693.2                    | 561.2                          | 27.3                                      | 280                    | 4364850000    | 1                         |
| Belarus                  | 4.35                      | 62.3                                     | 13.5                                      | 948.2                    | 810.7                          | 26.3                                      | 9473                   | 57231905886   | 2                         |
| Belgium                  | 3.45                      | 70.8                                     | 18.3                                      | 431.4                    | 363.0                          | 25.9                                      | 10939                  | 483548693409  | 1                         |
| Belize                   | 2.62                      | 61.9                                     | 13.1                                      | 978.9                    | 747.1                          | 28.4                                      | 322                    | 1397115000    | 3                         |
| Benin                    | 2.85                      | 51.7                                     | 12.9                                      | 1328.3                   | 649.3                          | 23.1                                      | 9199                   | 6970254725    | 4                         |
| Bhutan                   | 3.64                      | 58.7                                     | 13.8                                      | 888.1                    | 629.0                          | 23.3                                      | 728                    | 1585464266    | 3                         |
| Bolivia                  | 3.59                      | 61                                       | 15.7                                      | 821.2                    | 544.7                          | 25.8                                      | 9918                   | 19649786223   | 3                         |
| Bosnia and Herzegovina   | 3.46                      | 66.7                                     | 14.8                                      | 634.2                    | 582.7                          | 25.4                                      | 3722                   | 17176320803   | 2                         |
| Botswana                 | 2.53                      | 52.9                                     | 12.4                                      | 1337.3                   | 676.5                          | 24.1                                      | 2015                   | 12786614682   | 2                         |
| Brazil                   | 4.11                      | 64.5                                     | 15.6                                      | 698.9                    | 526.3                          | 25.8                                      | 196796                 | 2208838108593 | 2                         |
| Brunei Darussalam        | 4.42                      | 67.9                                     | 15.8                                      | 596.7                    | 519.2                          | 26.4                                      | 389                    | 13707116269   | 1                         |
| Bulgaria                 | 3.62                      | 65.7                                     | 14.8                                      | 743.9                    | 683.8                          | 26                                        | 7405                   | 50610343680   | 2                         |
| Burkina Faso             | 2.88                      | 49.7                                     | 11.2                                      | 1592.5                   | 746.2                          | 21.8                                      | 15605                  | 8979964356    | 4                         |
| Burundi                  | 1.73                      | 50.3                                     | 12.1                                      | 1476.6                   | 663.0                          | 21.3                                      | 8767                   | 2032137629    | 4                         |
| Cambodia                 | 4.41                      | 58.5                                     | 12.2                                      | 1059.7                   | 705.2                          | 21.6                                      | 14309                  | 11242278819   | 4                         |
| Cameroon                 | 2.09                      | 48.3                                     | 12.1                                      | 1571.6                   | 700.6                          | 24                                        | 19971                  | 26143817371   | 3                         |
| Canada                   | 3.71                      | 72.2                                     | 19.6                                      | 379.0                    | 326.3                          | 26.8                                      | 34169                  | 1613463452091 | 1                         |
| Cape Verde               | 3.25                      | 63.1                                     | 13.9                                      | 837.4                    | 596.4                          | 24.2                                      | 502                    | 1664310632    | 3                         |
| Central African Republic | 2.80                      | 42.7                                     | 10.9                                      | 1952.5                   | 718.0                          | 22.4                                      | 4449                   | 2033813912    | 4                         |
| Chad                     | 2.87                      | 45.1                                     | 11.2                                      | 1755.1                   | 759.0                          | 21.6                                      | 11887                  | 9791128578    | 4                         |
| Chile                    | 2.80                      | 68.9                                     | 17.3                                      | 503.9                    | 417.3                          | 27.4                                      | 16993                  | 218537565497  | 2                         |
| China                    | 4.83                      | 67.6                                     | 15.4                                      | 663.7                    | 573.0                          | 23.2                                      | 1367317                | 6066351252194 | 2                         |
| Colombia                 | 4.09                      | 65.7                                     | 16.2                                      | 678.8                    | 505.7                          | 25.7                                      | 45918                  | 287018179194  | 2                         |
| Comoros                  | 1.67                      | 54.7                                     | 12.3                                      | 1295.6                   | 695.2                          | 23.8                                      | 690                    | 1068064352    | 4                         |
| Congo                    | 2.25                      | 54.2                                     | 12.8                                      | 1281.6                   | 594.5                          | 22.8                                      | 4387                   | 12281046233   | 3                         |

|                                       |      |      |      |        |       |      |         |               |   |
|---------------------------------------|------|------|------|--------|-------|------|---------|---------------|---|
| Costa Rica                            | 3.18 | 69.7 | 18.2 | 495.9  | 408.0 | 26.8 | 4545    | 37268635236   | 2 |
| Côte d'Ivoire                         | 2.80 | 46.2 | 10.4 | 1919.4 | 934.0 | 23.5 | 20401   | 24884503951   | 3 |
| Croatia                               | 3.71 | 67.9 | 15.6 | 595.4  | 538.9 | 26.7 | 4328    | 59829429869   | 1 |
| Cuba                                  | 2.64 | 69   | 17.1 | 525.0  | 441.8 | 25.2 | 11333   | 64328000000   | 2 |
| Cyprus                                | 4.06 | 72.4 | 18.2 | 467.5  | 419.4 | 26.7 | 1113    | 25560729794   | 1 |
| Czechia                               | 3.98 | 68.1 | 15.8 | 547.7  | 481.9 | 26.8 | 10536   | 207016402026  | 1 |
| Democratic People's Republic of Korea | 3.79 | 62.3 | 13.4 | 946.9  | 736.6 | 23.6 | 24592   | 13945167273   | 4 |
| Democratic Republic of the Congo      | 2.42 | 49.9 | 12.2 | 1426.6 | 599.6 | 21.6 | 64523   | 21565746507   | 4 |
| Denmark                               | 3.27 | 70.4 | 17.9 | 473.9  | 420.8 | 25.3 | 5555    | 321995350347  | 1 |
| Djibouti                              | 2.36 | 54.3 | 13.2 | 1235.1 | 587.2 | 23.9 | 851     | 1066964512    | 3 |
| Dominican Republic                    | 2.60 | 63.8 | 16.8 | 721.7  | 503.0 | 25.9 | 9898    | 53131694070   | 2 |
| Ecuador                               | 3.03 | 66.8 | 17.7 | 587.5  | 410.8 | 26.5 | 14935   | 69555367000   | 2 |
| Egypt                                 | 3.68 | 60   | 12   | 954.2  | 835.1 | 28.8 | 84108   | 214630372041  | 3 |
| El Salvador                           | 3.19 | 64.2 | 16.2 | 727.9  | 517.0 | 27.1 | 6165    | 21418328456   | 3 |
| Equatorial Guinea                     | 2.30 | 51.2 | 13.5 | 1478.2 | 755.7 | 23.5 | 951     | 16298541318   | 1 |
| Eritrea                               | 2.37 | 55.3 | 13   | 1290.8 | 681.0 | 20.5 | 4391    | 2117039511    | 4 |
| Estonia                               | 3.95 | 66.7 | 15.9 | 613.0  | 540.6 | 26.1 | 1332    | 19502554977   | 1 |
| Ethiopia                              | 2.27 | 54   | 13   | 1213.6 | 570.7 | 20.3 | 87703   | 26311297202   | 4 |
| Fiji                                  | 2.87 | 60.4 | 12.3 | 991.4  | 847.1 | 27.2 | 860     | 3140336425    | 3 |
| Finland                               | 3.85 | 70.4 | 18.2 | 438.5  | 386.9 | 26   | 5366    | 247799815768  | 1 |
| France                                | 3.77 | 72.2 | 19.8 | 383.9  | 325.8 | 25.1 | 63027   | 2646837111795 | 1 |
| Gabon                                 | 2.01 | 54.8 | 13.4 | 1203.8 | 515.8 | 24.7 | 1640    | 12882003773   | 2 |
| Gambia                                | 3.07 | 52.5 | 11.4 | 1493.5 | 742.7 | 23.4 | 1692    | 952430610     | 4 |
| Georgia                               | 5.30 | 64.8 | 14.7 | 808.2  | 720.6 | 26.8 | 4232    | 11638284841   | 3 |
| Germany                               | 3.54 | 70.9 | 18.2 | 438.8  | 393.1 | 26.3 | 80895   | 3417094562649 | 1 |
| Ghana                                 | 2.35 | 54.1 | 12   | 1404.5 | 701.2 | 23.6 | 24512   | 32174210793   | 3 |
| Greece                                | 3.77 | 71.5 | 18.6 | 420.7  | 374.3 | 27.1 | 11446   | 299361576565  | 1 |
| Grenada                               | 2.61 | 64   | 14.2 | 798.5  | 668.4 | 26.4 | 105     | 771014815     | 2 |
| Guatemala                             | 2.94 | 62.1 | 15.2 | 765.3  | 472.2 | 26   | 14630   | 41338158765   | 3 |
| Guinea                                | 2.77 | 50   | 11.1 | 1600.4 | 790.4 | 22.6 | 10794   | 6853390371    | 4 |
| Guinea-Bissau                         | 3.03 | 48.8 | 10.4 | 1629.8 | 723.9 | 23   | 1556    | 849050091     | 4 |
| Guyana                                | 2.45 | 57.8 | 12.9 | 1138.8 | 819.3 | 25.8 | 747     | 2259290304    | 3 |
| Haiti                                 | 2.66 | 32.3 | 8.1  | 3311.3 | 679.9 | 24.6 | 10000   | 6707774880    | 4 |
| Honduras                              | 2.95 | 65.5 | 16.6 | 647.1  | 450.4 | 26.1 | 8195    | 15839344592   | 3 |
| Hungary                               | 4.23 | 65.6 | 14.4 | 711.2  | 647.4 | 26.8 | 9928    | 130922638689  | 1 |
| Iceland                               | 3.58 | 72.6 | 19.1 | 373.8  | 330.0 | 26   | 320     | 13310568487   | 1 |
| India                                 | 3.72 | 57.4 | 12.4 | 1008.9 | 622.7 | 21.4 | 1230981 | 1650634716716 | 3 |
| Indonesia                             | 3.36 | 60.4 | 12.4 | 1055.5 | 778.0 | 22.5 | 242524  | 755094157594  | 3 |
| Iran                                  | 4.02 | 63.9 | 14.3 | 720.7  | 605.4 | 25.8 | 74568   | 491098657663  | 2 |
| Iraq                                  | 3.76 | 59.6 | 12.9 | 837.7  | 663.8 | 28   | 30763   | 117137606838  | 3 |
| Ireland                               | 3.74 | 71.5 | 18.6 | 409.7  | 359.9 | 27.1 | 4627    | 221951353834  | 1 |
| Israel                                | 3.79 | 72.4 | 19.3 | 372.1  | 320.8 | 26.9 | 7426    | 233611022914  | 1 |
| Italy                                 | 4.42 | 72.8 | 19.4 | 364.7  | 328.9 | 25.7 | 59730   | 2125058270214 | 1 |
| Jamaica                               | 1.92 | 66.1 | 17   | 610.9  | 456.8 | 26.9 | 2817    | 13219465065   | 2 |
| Japan                                 | 4.89 | 73.8 | 20.3 | 334.8  | 264.0 | 22.7 | 128552  | 5700098114744 | 1 |
| Jordan                                | 4.13 | 64.7 | 14.4 | 757.1  | 654.1 | 28.5 | 7182    | 26425379366   | 2 |

|                                  |      |      |      |        |       |      |        |               |   |
|----------------------------------|------|------|------|--------|-------|------|--------|---------------|---|
| Kazakhstan                       | 5.98 | 60.2 | 12.9 | 1114.9 | 948.7 | 26   | 16399  | 148047348241  | 2 |
| Kenya                            | 1.48 | 55.5 | 13.7 | 1171.4 | 377.1 | 22.8 | 41350  | 39999677643   | 4 |
| Kiribati                         | 2.22 | 57.5 | 12.3 | 1120.2 | 800.7 | 29.6 | 103    | 153281601     | 3 |
| Kuwait                           | 3.88 | 64.6 | 12.8 | 839.4  | 690.7 | 29   | 2998   | 115416047508  | 1 |
| Kyrgyzstan                       | 5.38 | 61.1 | 13.5 | 1007.1 | 842.1 | 25.8 | 5422   | 4794361821    | 4 |
| Lao People's Democratic Republic | 4.45 | 56   | 11.9 | 1197.0 | 793.2 | 22.2 | 6246   | 7313450659    | 3 |
| Latvia                           | 4.19 | 64.6 | 14.8 | 756.2  | 655.4 | 26.3 | 2119   | 23765143538   | 2 |
| Lebanon                          | 3.13 | 65.2 | 14.6 | 647.7  | 578.2 | 27.1 | 4337   | 38419635158   | 2 |
| Lesotho                          | 2.62 | 45.7 | 11.5 | 1888.4 | 771.1 | 24.7 | 2041   | 2394090236    | 3 |
| Liberia                          | 2.68 | 51.6 | 11.3 | 1460.7 | 633.6 | 23.8 | 3948   | 1292000000    | 4 |
| Libya                            | 4.24 | 62.9 | 13.4 | 801.5  | 680.6 | 27.6 | 6169   | 80942419624   | 2 |
| Lithuania                        | 4.07 | 64.5 | 15   | 744.8  | 629.5 | 26.3 | 3124   | 37130286247   | 2 |
| Luxembourg                       | 4.07 | 71.7 | 18.8 | 391.3  | 335.0 | 26.1 | 508    | 53212476812   | 1 |
| Madagascar                       | 2.20 | 55.8 | 12.7 | 1189.4 | 665.5 | 21.1 | 21152  | 10401074456   | 4 |
| Malawi                           | 1.66 | 50.4 | 12.4 | 1516.4 | 566.6 | 22.5 | 15167  | 6959686850    | 4 |
| Malaysia                         | 3.57 | 65.6 | 14.4 | 729.7  | 547.2 | 25   | 28112  | 255017645207  | 2 |
| Maldives                         | 3.31 | 67.6 | 15   | 607.0  | 536.2 | 24.6 | 365    | 2588176058    | 2 |
| Mali                             | 3.15 | 48.4 | 11.2 | 1643.5 | 816.9 | 22.6 | 15075  | 10678749002   | 4 |
| Malta                            | 4.10 | 71.6 | 18.5 | 411.8  | 368.0 | 27.1 | 416    | 8740539199    | 1 |
| Mauritania                       | 2.97 | 54.5 | 12.1 | 1295.4 | 636.6 | 24.6 | 3610   | 4337791531    | 3 |
| Mauritius                        | 5.45 | 64.5 | 14.9 | 729.9  | 624.4 | 25   | 1248   | 10003670690   | 2 |
| Mexico                           | 2.76 | 66.5 | 16.5 | 614.0  | 484.4 | 27.5 | 117319 | 1057800597974 | 2 |
| Micronesia                       | 2.56 | 60.3 | 12.8 | 983.9  | 782.0 | 29.3 | 104    | 296525259     | 3 |
| Mongolia                         | 5.14 | 60.2 | 12.8 | 1075.6 | 922.4 | 25.4 | 2713   | 7189482030    | 3 |
| Montenegro                       | 3.63 | 67.1 | 15.1 | 668.3  | 617.2 | 26.1 | 624    | 4137925817    | 2 |
| Morocco                          | 4.31 | 63.5 | 14.3 | 710.3  | 567.5 | 25.4 | 32410  | 93217221947   | 3 |
| Mozambique                       | 2.24 | 47.6 | 12.4 | 1575.5 | 574.8 | 22.3 | 24221  | 10154250870   | 4 |
| Myanmar                          | 4.49 | 56.3 | 11.7 | 1146.7 | 769.1 | 22.1 | 50156  | 41444923053   | 4 |
| Namibia                          | 2.64 | 53.4 | 12.4 | 1364.3 | 710.2 | 23.8 | 2173   | 11282158756   | 2 |
| Nepal                            | 3.89 | 59.2 | 12.5 | 1014.4 | 664.2 | 21.8 | 27023  | 16280802530   | 4 |
| Netherlands                      | 3.32 | 71.4 | 18.4 | 411.8  | 364.0 | 25.5 | 16683  | 836389937229  | 1 |
| New Zealand                      | 3.47 | 72   | 19.7 | 390.9  | 341.1 | 27.6 | 4370   | 146583831538  | 1 |
| Nicaragua                        | 3.22 | 65.5 | 16.7 | 652.0  | 510.2 | 26.7 | 5738   | 8758602361    | 3 |
| Niger                            | 2.92 | 49.4 | 11.4 | 1566.6 | 695.7 | 21.5 | 16426  | 5718587531    | 4 |
| Nigeria                          | 2.82 | 46.2 | 10.2 | 1987.6 | 826.9 | 23   | 158578 | 369062403226  | 3 |
| Norway                           | 3.80 | 71.8 | 18.7 | 403.7  | 351.4 | 26.4 | 4886   | 429130952709  | 1 |
| Oman                             | 3.78 | 65.5 | 14.6 | 628.6  | 517.3 | 25.9 | 3041   | 58641252346   | 1 |
| Pakistan                         | 3.91 | 56.2 | 12.6 | 1076.6 | 727.1 | 23.4 | 170560 | 174507923711  | 3 |
| Panama                           | 3.39 | 68.3 | 18.1 | 541.9  | 391.4 | 26.5 | 3643   | 28917170797   | 2 |
| Papua New Guinea                 | 2.45 | 56.9 | 13   | 1118.9 | 651.5 | 25   | 7108   | 14204789049   | 3 |
| Paraguay                         | 4.31 | 64.5 | 16   | 685.6  | 528.7 | 26   | 6210   | 20047518467   | 3 |
| Peru                             | 3.07 | 66.3 | 16.4 | 640.8  | 440.7 | 26   | 29374  | 147527631521  | 2 |
| Philippines                      | 4.29 | 60.6 | 13   | 1027.2 | 724.1 | 22.7 | 93727  | 199590933677  | 3 |
| Poland                           | 3.84 | 67.3 | 15.9 | 599.1  | 526.9 | 26.1 | 38323  | 479321128909  | 1 |
| Portugal                         | 4.24 | 70.8 | 18.5 | 443.2  | 373.4 | 25.8 | 10652  | 238303443425  | 1 |
| Qatar                            | 4.21 | 66.7 | 14.7 | 574.0  | 505.0 | 28.5 | 1780   | 123627107054  | 1 |

|                                  |      |      |      |        |        |      |        |                |   |
|----------------------------------|------|------|------|--------|--------|------|--------|----------------|---|
| Republic of Korea                | 5.21 | 71.4 | 18.4 | 410.8  | 324.3  | 23.5 | 49553  | 1094499350178  | 1 |
| Republic of Moldova              | 3.95 | 61.3 | 12.7 | 1042.7 | 905.0  | 26.6 | 4084   | 5811622394     | 3 |
| Romania                          | 4.12 | 65.2 | 14.7 | 732.5  | 649.5  | 26   | 20440  | 167998049026   | 2 |
| Russian Federation               | 4.17 | 61   | 13.7 | 971.6  | 803.2  | 26.1 | 143154 | 1524916698233  | 2 |
| Rwanda                           | 1.60 | 56.2 | 13.4 | 1104.5 | 570.1  | 21.7 | 10247  | 5774003679     | 4 |
| Saint Lucia                      | 2.93 | 65.7 | 16.7 | 636.8  | 510.2  | 28.7 | 173    | 1244296296     | 2 |
| Saint Vincent and the Grenadines | 2.82 | 63.4 | 14.6 | 808.3  | 627.9  | 26.6 | 109    | 681225926      | 2 |
| Samoa                            | 2.07 | 64.4 | 14.3 | 739.0  | 609.1  | 31.5 | 186    | 679252092      | 3 |
| Sao Tome and Principe            | 2.36 | 59   | 13.9 | 997.7  | 627.9  | 24.4 | 175    | 197454025      | 3 |
| Saudi Arabia                     | 3.20 | 64.4 | 13.7 | 747.8  | 599.6  | 28.1 | 27426  | 528207332650   | 1 |
| Senegal                          | 3.15 | 56.1 | 12.4 | 1232.2 | 686.5  | 22.7 | 12916  | 12925679250    | 3 |
| Serbia                           | 3.67 | 66.2 | 14.3 | 703.4  | 655.6  | 25.8 | 9030   | 39460338235    | 2 |
| Seychelles                       | 4.34 | 64.6 | 15.1 | 784.0  | 623.1  | 26.2 | 91     | 969964538      | 2 |
| Sierra Leone                     | 2.51 | 43.9 | 9.8  | 2216.1 | 1018.1 | 22.6 | 6459   | 2578026280     | 4 |
| Singapore                        | 5.14 | 74.8 | 20   | 378.5  | 290.8  | 23.5 | 5074   | 236420337243   | 1 |
| Slovakia                         | 4.23 | 66.8 | 15.1 | 655.3  | 577.0  | 26   | 5404   | 89501012916    | 1 |
| Slovenia                         | 4.23 | 69.2 | 16.8 | 458.0  | 395.0  | 26.1 | 2045   | 48013606724    | 1 |
| Solomon Islands                  | 2.33 | 60.6 | 12.6 | 961.6  | 739.1  | 25.8 | 528    | 719622919      | 3 |
| Somalia                          | 2.07 | 47.6 | 12.3 | 1632.1 | 619.8  | 22.8 | 12053  | 1071191223     | 4 |
| South Africa                     | 2.48 | 50.5 | 11.5 | 1531.1 | 752.7  | 26.9 | 51585  | 375348270354   | 2 |
| Spain                            | 4.02 | 72.9 | 19.7 | 360.4  | 324.7  | 26.2 | 46789  | 1431616749640  | 1 |
| Sri Lanka                        | 3.87 | 66.1 | 15.5 | 669.1  | 542.6  | 22.5 | 20198  | 56725754848    | 3 |
| Sudan                            | 2.37 | 54   | 12.6 | 1152.0 | 761.1  | 24.2 | 34386  | 54458738026    | 3 |
| Suriname                         | 2.89 | 61.8 | 14.2 | 857.6  | 648.8  | 26.1 | 526    | 4368377356     | 2 |
| Swaziland                        | 2.53 | 44.2 | 11.2 | 1911.1 | 788.8  | 26.4 | 1203   | 4436297681     | 3 |
| Sweden                           | 3.65 | 71.9 | 18.8 | 387.6  | 343.8  | 25.8 | 9390   | 488377689565   | 1 |
| Switzerland                      | 3.61 | 72.5 | 19.6 | 353.4  | 311.8  | 25.1 | 7832   | 583782977866   | 1 |
| Syrian Arab Republic             | 4.18 | 64.1 | 14.2 | 741.3  | 662.1  | 27.7 | 21019  | 60465112082    | 3 |
| Tajikistan                       | 5.40 | 62.4 | 14   | 897.6  | 710.5  | 25.2 | 7642   | 5642175856     | 4 |
| Thailand                         | 5.31 | 65.5 | 16.1 | 665.2  | 469.0  | 23.8 | 67209  | 341104671649   | 2 |
| North Macedonia                  | 3.91 | 66.5 | 14.5 | 719.2  | 674.5  | 26.3 | 2071   | 9407160111     | 2 |
| Timor-Leste                      | 4.47 | 57.3 | 10.3 | 1054.8 | 684.8  | 20.7 | 1110   | 3998800146     | 3 |
| Togo                             | 2.78 | 51.1 | 11.2 | 1628.2 | 821.1  | 23.1 | 6503   | 3426118972     | 4 |
| Tonga                            | 2.73 | 63.7 | 13.8 | 776.6  | 657.4  | 31.8 | 104    | 373874368      | 3 |
| Trinidad and Tobago              | 2.93 | 62.4 | 14.4 | 839.6  | 670.7  | 27   | 1328   | 22122941831    | 1 |
| Tunisia                          | 4.43 | 65.1 | 14.5 | 676.5  | 574.2  | 25.9 | 10640  | 44051138745    | 2 |
| Turkey                           | 4.10 | 64.4 | 14.7 | 664.9  | 591.3  | 27.5 | 72327  | 771876791418   | 2 |
| Turkmenistan                     | 5.43 | 59.8 | 13.9 | 995.7  | 813.3  | 25.8 | 5087   | 22583157895    | 3 |
| Uganda                           | 2.11 | 50.4 | 12.4 | 1469.3 | 650.9  | 22   | 33915  | 19803211403    | 4 |
| Ukraine                          | 4.19 | 62.2 | 13.7 | 956.8  | 809.3  | 26.3 | 45793  | 136012480322   | 3 |
| United Arab Emirates             | 3.67 | 66.4 | 14.8 | 620.0  | 530.0  | 28   | 8271   | 289787452661   | 1 |
| United Kingdom                   | 3.61 | 71.3 | 18.8 | 417.5  | 367.6  | 27   | 63307  | 2441173394730  | 1 |
| United Republic of Tanzania      | 2.75 | 52.3 | 13   | 1386.0 | 539.6  | 22.8 | 46099  | 31105429967    | 4 |
| United States of America         | 3.60 | 68.7 | 17.8 | 483.1  | 412.8  | 28.5 | 308641 | 14964372000000 | 1 |
| Uruguay                          | 2.73 | 68   | 16.9 | 580.8  | 475.3  | 26.7 | 3374   | 40284556645    | 2 |
| Uzbekistan                       | 5.63 | 63.2 | 14.1 | 838.2  | 719.1  | 26   | 28606  | 39525875086    | 3 |

|           |      |      |      |        |       |      |       |              |   |
|-----------|------|------|------|--------|-------|------|-------|--------------|---|
| Vanuatu   | 2.24 | 62   | 13.2 | 886.0  | 707.9 | 25.9 | 236   | 700804045    | 3 |
| Venezuela | 3.55 | 65.7 | 16.6 | 676.8  | 496.3 | 26.6 | 29028 | 393805672596 | 2 |
| Viet Nam  | 4.59 | 66.5 | 16.7 | 600.4  | 452.6 | 21   | 88473 | 115931749905 | 3 |
| Yemen     | 3.37 | 54.3 | 11.3 | 1200.0 | 909.3 | 23.3 | 23607 | 29031038812  | 3 |
| Zambia    | 2.27 | 50.1 | 12.2 | 1477.5 | 592.1 | 22.2 | 13850 | 20265400495  | 3 |
| Zimbabwe  | 3.10 | 46.7 | 12.3 | 1810.4 | 633.0 | 23.6 | 14086 | 10052045231  | 4 |

2010 sodium intake (Powles et al.). 2010 Healthy life expectancy (<http://apps.who.int/gho/data/view.main.HALEXv>, last accessed October 2nd 2018), 2010 ASDR ([http://www.who.int/healthinfo/global\\_burden\\_disease/estimates/en/](http://www.who.int/healthinfo/global_burden_disease/estimates/en/), last accessed July 11th 2018), age standardized BMI (<http://apps.who.int/gho/data/node.main.A904?lang=en>, last accessed October 2nd 2018), GDP USD (<http://data.un.org>, last accessed July 8th 2018), 2010 World Bank Income Class ([siteresources.worldbank.org/DATASTATISTICS/Resources/OGHIST.xls](http://siteresources.worldbank.org/DATASTATISTICS/Resources/OGHIST.xls), last accessed February 24th 2019). 1 = high income, 2 = upper middle income, 3 = lower middle income, 4 = low income. ASDR were available for 182 of the 187 countries analyzed in Powles et al.. No ASDR was available for Andorra, Dominica, Marshall Islands, Taiwan, and Palestine. Data from Haiti were omitted because of the excessive death toll following the earthquake on January 12, 2010. Abbreviations: BMI, body mass index; GDP, gross domestic product; USD, US dollars; ASDR, age standardized death rate per 100 000 persons.

**Table S2.** Linear and quantile regression for sodium intake for the year of 2010 without considering the interaction of gross domestic product per capita or age standardized body-mass index for the 181 countries worldwide.

| <b>Sodium intake<br/>(grams/day)</b> | <b>Life expectancy<br/>at birth</b> | <b>Life expectancy<br/>at 60 years</b> | <b>Death due to non-<br/>communicable<br/>diseases</b> | <b>All-cause<br/>mortality</b> |
|--------------------------------------|-------------------------------------|----------------------------------------|--------------------------------------------------------|--------------------------------|
| <b>Linear regression</b>             |                                     |                                        |                                                        |                                |
| $\beta$ -coefficient (95%CI)         | 4.14 (3.08 to 5.20)                 | 0.87 (0.48 to 1.25)                    | -14.43 (-39.8 to -10.9)                                | -211 (-270 to -153)            |
| <i>p</i> -value                      | <0.001                              | <0.001                                 | 0.262                                                  | <0.001                         |
| R <sup>2</sup>                       | 0.250                               | 0.101                                  | 0.010                                                  | 0.221                          |
| <b>Quantile regression</b>           |                                     |                                        |                                                        |                                |
| <b>25<sup>th</sup> percentile</b>    |                                     |                                        |                                                        |                                |
| $\beta$ -coefficient (95%CI)         | 4.37 (2.77 to 5.98)                 | 0.56 (0.12 to 0.99)                    | -61.26 (-107 to -15.9)                                 | -135 (-211 to -59.7)           |
| <i>p</i> -value                      | <0.001                              | 0.012                                  | 0.008                                                  | 0.001                          |
| R <sup>2</sup>                       | 0.185                               | 0.058                                  | 0.020                                                  | 0.043                          |
| <b>50<sup>th</sup> percentile</b>    |                                     |                                        |                                                        |                                |
| $\beta$ -coefficient (95%CI)         | 3.47 (1.87 to 5.08)                 | 0.95 (0.50 to 1.39)                    | -16.95 (-49.8 to 15.8)                                 | -188 (-274 to -103)            |
| <i>p</i> -value                      | <0.001                              | <0.001                                 | 0.310                                                  | <0.001                         |
| R <sup>2</sup>                       | 0.099                               | 0.071                                  | 0.003                                                  | 0.098                          |
| <b>75<sup>th</sup> percentile</b>    |                                     |                                        |                                                        |                                |
| $\beta$ -coefficient (95%CI)         | 3.69 (2.23 to 5.15)                 | 1.40 (0.49 to 2.31)                    | 3.05 (-32.7 to -38.8)                                  | -218 (-319 to -117)            |
| <i>p</i> -value                      | <0.001                              | 0.003                                  | 0.870                                                  | <0.001                         |
| R <sup>2</sup>                       | 0.056                               | 0.031                                  | 0.001                                                  | 0.162                          |

CI, confidence interval.

**Table S3.** Linear and quantile regression for sodium intake for the year of 2010 without considering the interaction of gross domestic product per capita or age standardized body-mass index for the 46 countries classified as high-income countries by the World Bank.

| <b>Sodium intake<br/>(grams/day)</b> | <b>Life expectancy<br/>at birth</b> | <b>Life expectancy<br/>at 60 years</b> | <b>Death due to non-<br/>communicable<br/>diseases</b> | <b>All-cause<br/>mortality</b> |
|--------------------------------------|-------------------------------------|----------------------------------------|--------------------------------------------------------|--------------------------------|
| <b>Linear regression</b>             |                                     |                                        |                                                        |                                |
| $\beta$ -coefficient (95% CI)        | 2.98 (1.06 to 4.91)                 | 0.61 (-0.50 to 1.71)                   | -60.7 (-121 to 0.13)                                   | -141 (-236 to -45.7)           |
| <i>p</i> -value                      | 0.003                               | 0.274                                  | 0.050                                                  | 0.005                          |
| R <sup>2</sup>                       | 0.181                               | 0.027                                  | 0.084                                                  | 0.168                          |
| <b>Quantile regression</b>           |                                     |                                        |                                                        |                                |
| <b>25<sup>th</sup> percentile</b>    |                                     |                                        |                                                        |                                |
| $\beta$ -coefficient (95% CI)        | 3.25 (-0.31 to 6.80)                | 1.33 (-1.16 to 3.83)                   | -40.2 (-76 to -4.41)                                   | -27.4 (-60.3 to 5.59)          |
| <i>p</i> -value                      | 0.073                               | 0.287                                  | 0.029                                                  | 0.101                          |
| R <sup>2</sup>                       | 0.039                               | 0.035                                  | 0.050                                                  | 0.009                          |
| <b>50<sup>th</sup> percentile</b>    |                                     |                                        |                                                        |                                |
| $\beta$ -coefficient (95% CI)        | 1.45 (-1.34 to 4.24)                | 0.62 (-1.18 to 2.42)                   | -46.1 (-136 to 43.7)                                   | -20.4 (-138 to 97.3)           |
| <i>p</i> -value                      | 0.302                               | 0.493                                  | 0.310                                                  | 0.729                          |
| R <sup>2</sup>                       | 0.013                               | 0.011                                  | 0.038                                                  | 0.010                          |
| <b>75<sup>th</sup> percentile</b>    |                                     |                                        |                                                        |                                |
| $\beta$ -coefficient (95% CI)        | 1.53 (0.63 to 2.43)                 | 0.81 (0.03 to 1.58)                    | -81.7 (-233 to 69.6)                                   | -152.4 (-380 to 75.1)          |
| <i>p</i> -value                      | 0.001                               | 0.043                                  | 0.282                                                  | 0.184                          |
| R <sup>2</sup>                       | 0.055                               | 0.039                                  | 0.034                                                  | 0.041                          |

CI, confidence interval.
